# Supplementary material for: When climate change couples social neglect: malaria dynamics in Panamá
Source: PubMed Central journal article supplement — Emerg Microbes Infect. 2014 Apr 23;3(4):e27–. doi: 10.1038/emi.2014.27 (PMC4008768; doi:10.1038/emi.2014.27), 2014-04-23
Supplement: emi201427x1.pdf [file emi201427x1.pdf]

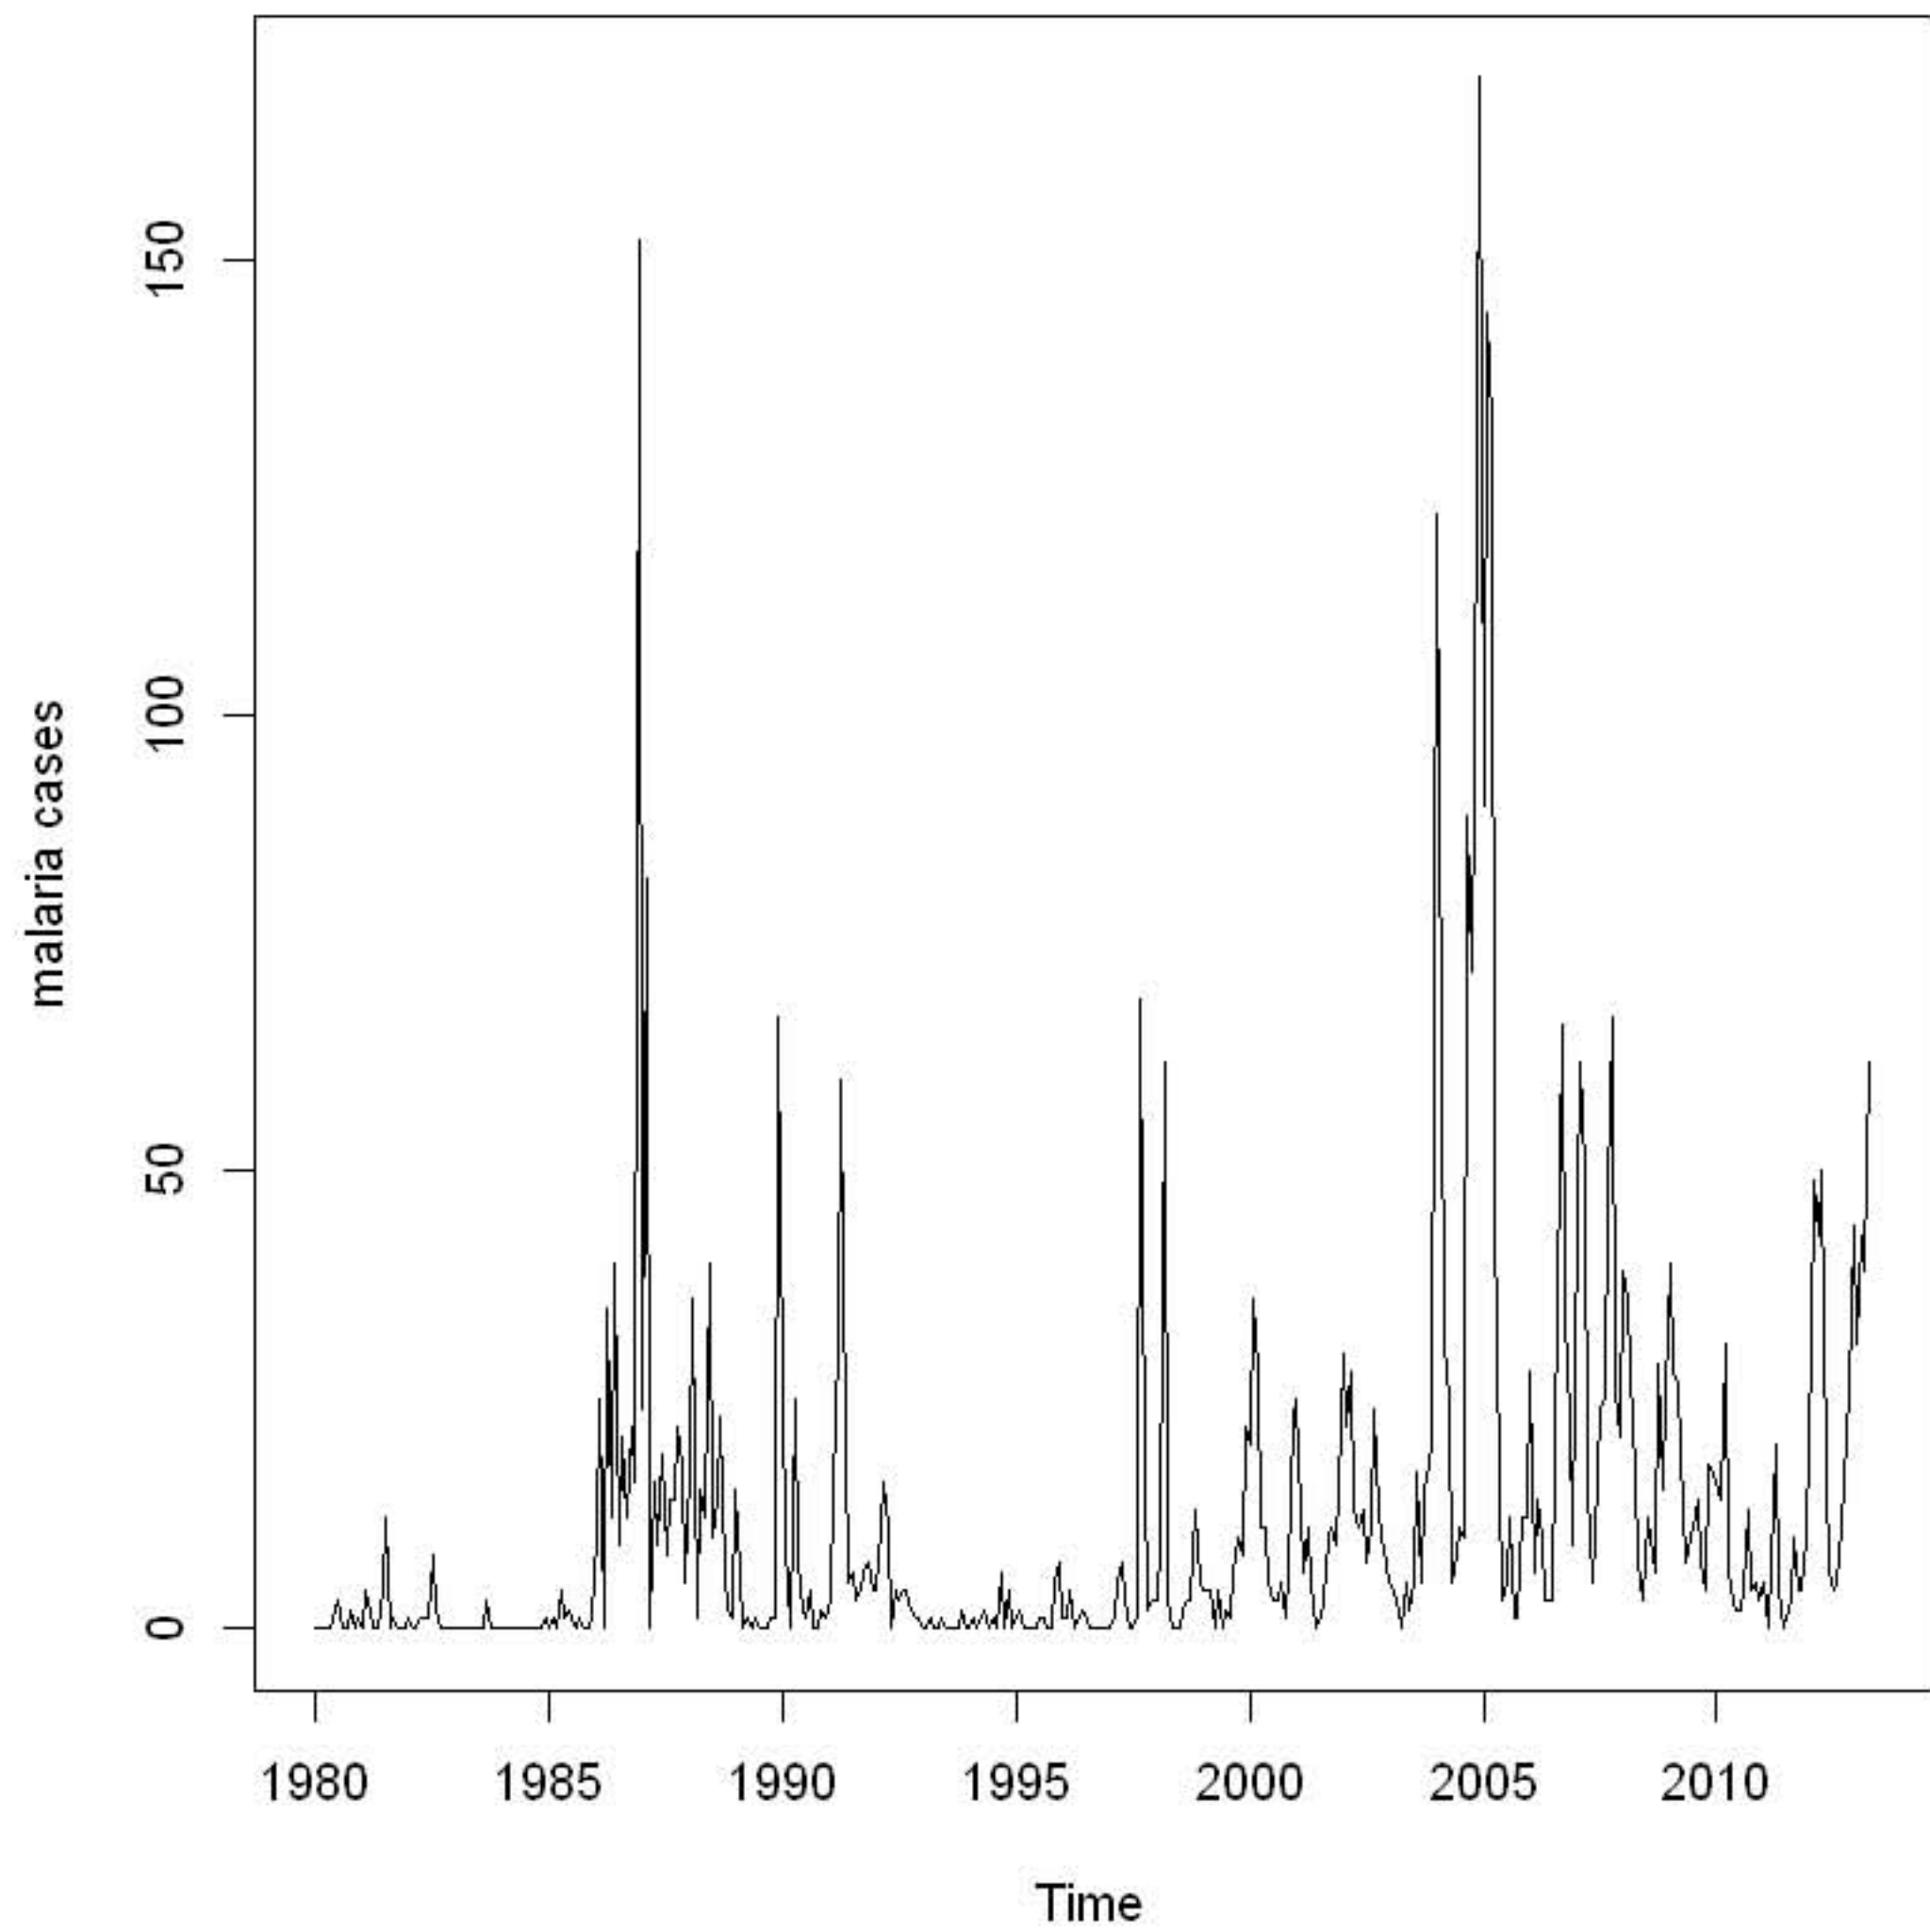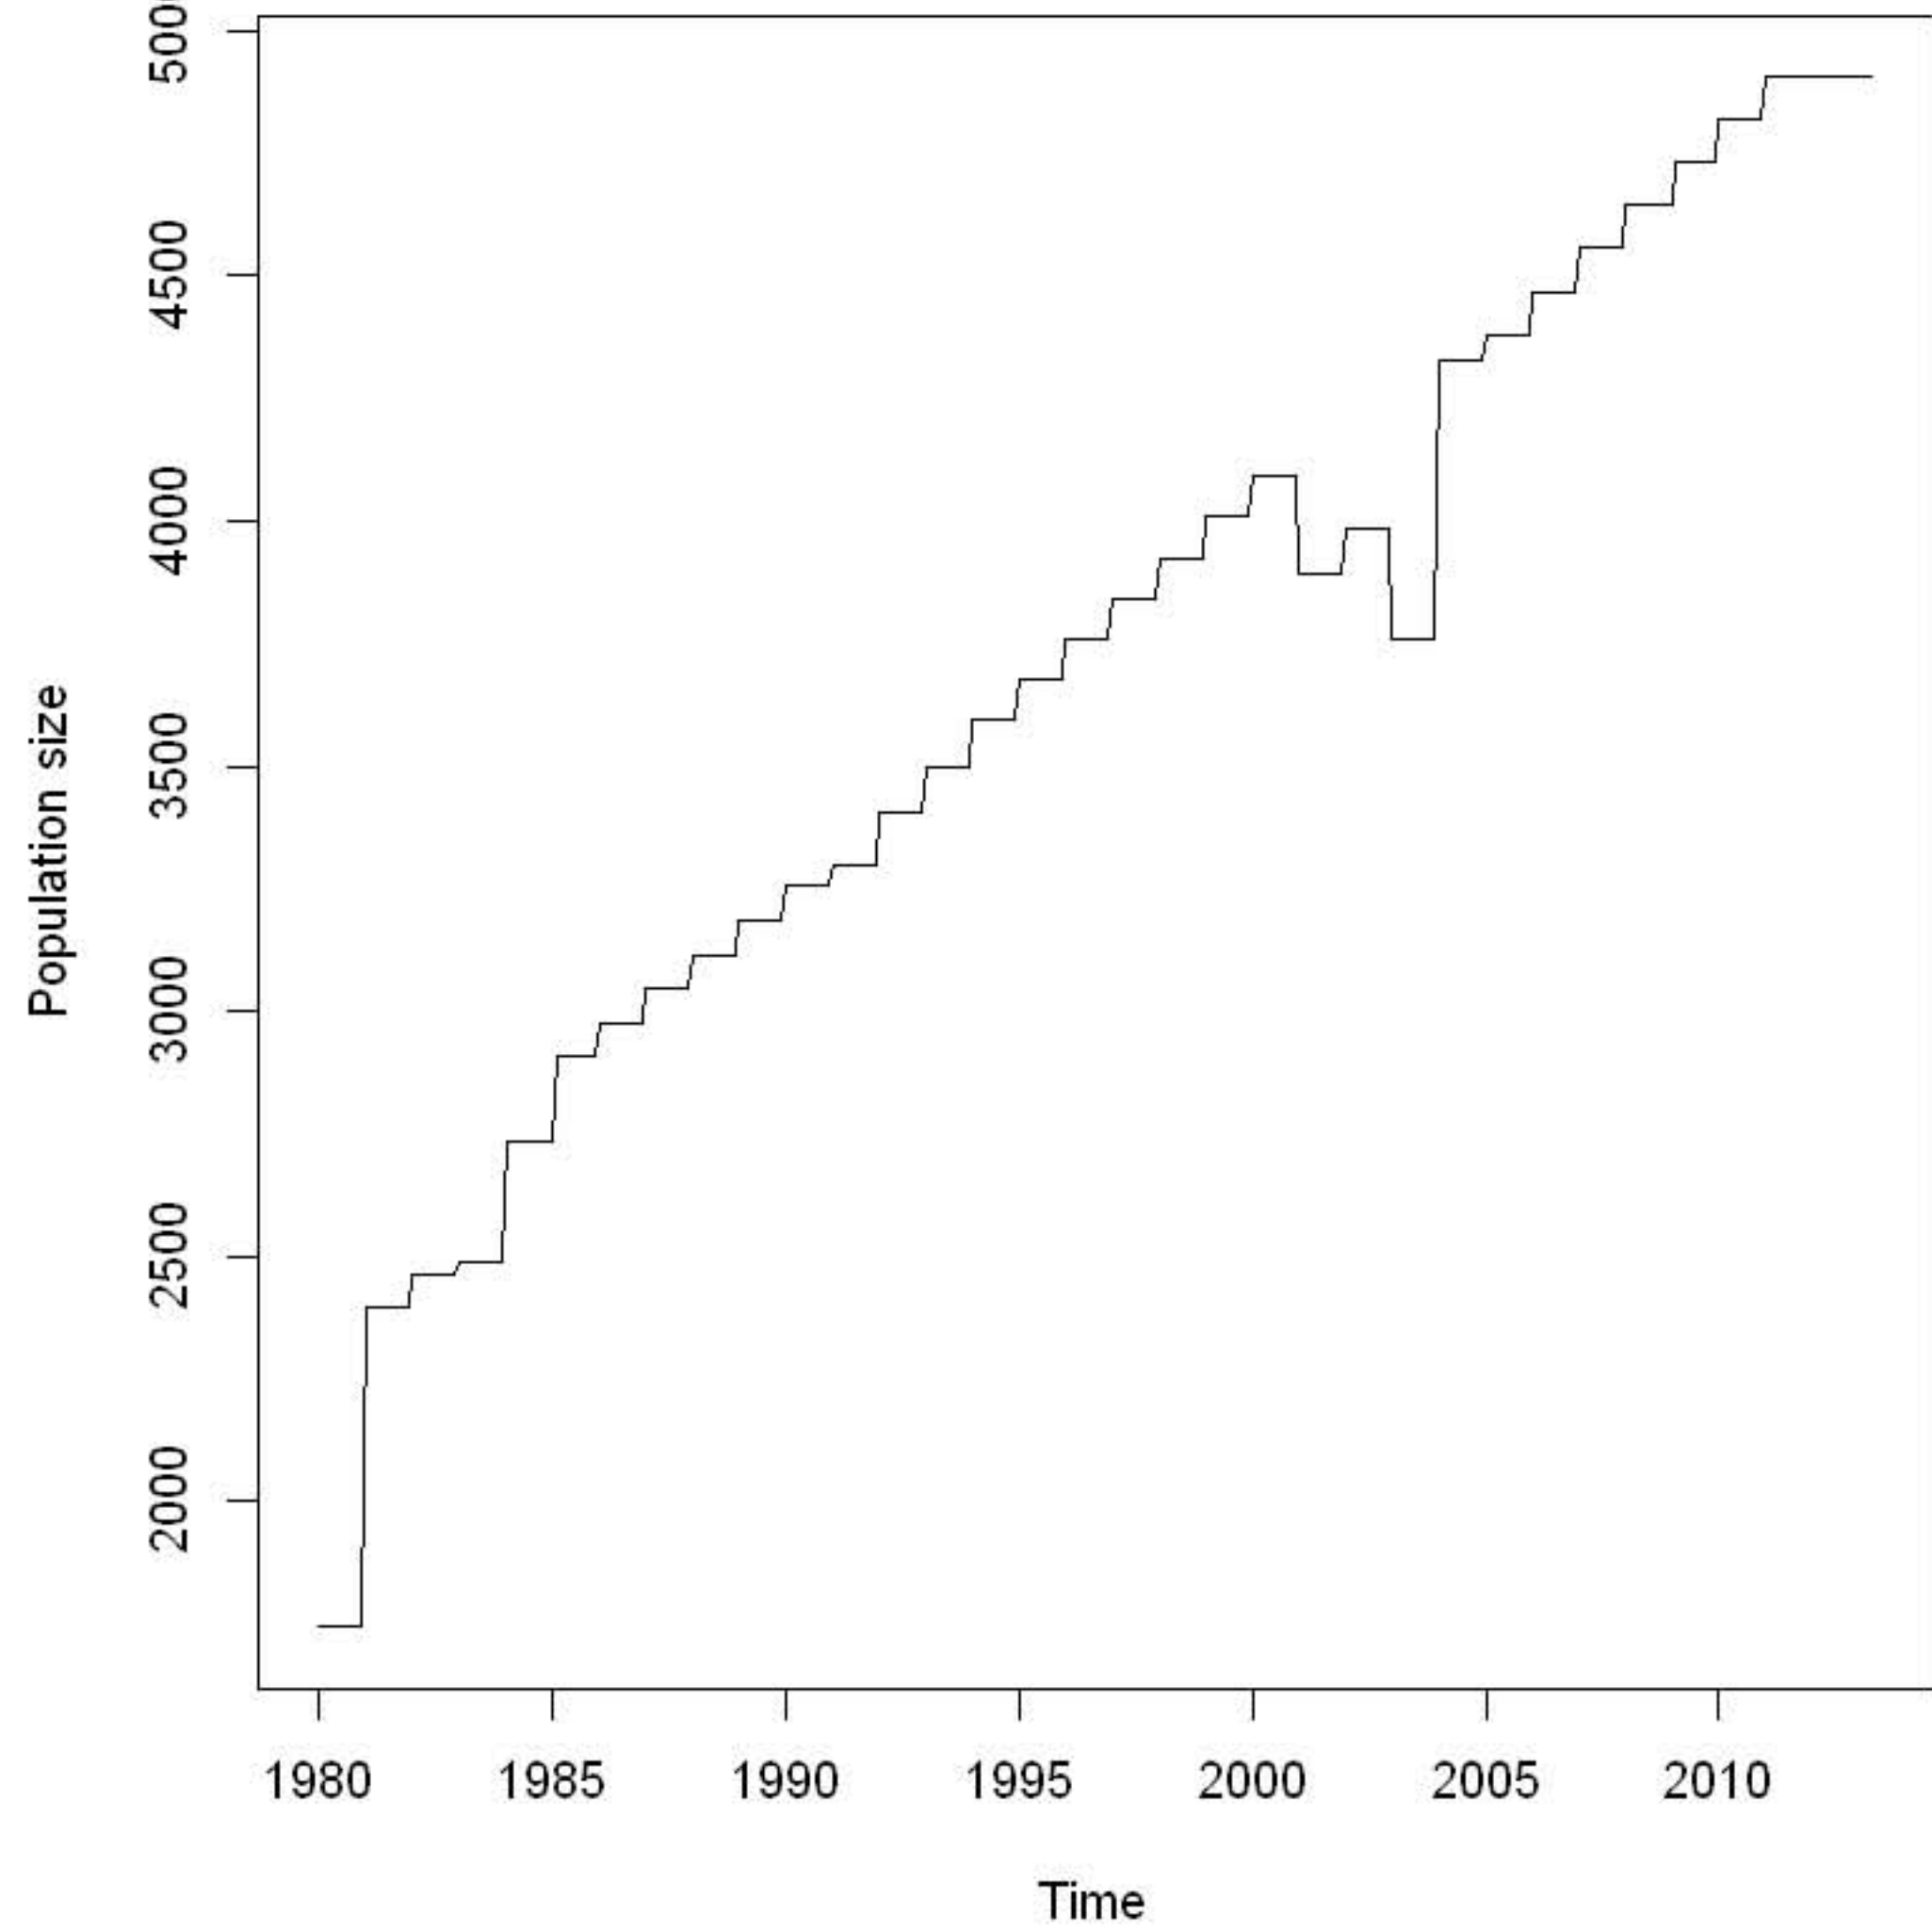

**Supplementary Figure Legend**

**Figure S1** Raw data. **(A)** Malaria Cases in Madungandí, República de Panamá. **(B)** Population Size in Madungandí, República de Panamá.
